# Supplementary material for: Dopant-mediated surface charge imbalance for enhancing the performance of metal oxide chemiresistive gas sensors
Source: Royal Society of Chemistry journal article supplement (doi:10.1039/d1tc05144j), 2022-01-01
Supplement: d1tc05144j1.pdf [file d1tc05144j1.pdf]

## **Supplementary Information**

# **Dopant Mediated Surface Charge Imbalance in Enhancing Performance of Metal Oxide Chemiresistive Gas Sensors**

Nirman Chakraborty and Swastik Mondal\*

CSIR-Central Glass and Ceramic Research Institute, 196, Raja S. C. Mullick Road, Jadavpur,  
Kolkata-700032, India

Corresponding author: [swastik\\_mondal@cgcricri.res.in](mailto:swastik_mondal@cgcricri.res.in)

## Calculations regarding estimation of excess surface charge per formula unit

### Case 1: Vanadium doped SnO<sub>2</sub> nano systems

#### Step 1: Estimation of area under the curve from deconvoluted XPS signals.

In this method, the first step is to deconvolute an XPS signal into maximum possible curves as expected from experiments. Then, the area under the curves are to be noted when optimum fitting has been achieved.

For example, we shall discuss the case of Sl. No. 2 in Table 1 of manuscript. This is a case of vanadium doped tin oxide ammonia sensors. After deconvoluting the Sn 3d and V 2p curves, following information for both compositions were available:

Table 1: Quantitative values of area under curve obtained from XPS curve deconvolution

| Sample                                                                                           | Vanadium                                  | Tin                                         | Oxygen (O <sub>2</sub> <sup>-defect</sup> ) |
|--------------------------------------------------------------------------------------------------|-------------------------------------------|---------------------------------------------|---------------------------------------------|
| Sn <sub>0.675</sub> V <sub>0.343</sub> O <sub>2</sub><br>(Formula unit from Rietveld refinement) | V 2p <sub>1/2</sub> :520.5                | Sn <sup>4+</sup> 3d <sub>3/2</sub> :17426.1 | O 1s: 6730                                  |
|                                                                                                  | V <sup>3+</sup> 2p <sub>3/2</sub> : 65.0  | 3d <sub>5/2</sub> :24923.3                  |                                             |
|                                                                                                  | V <sup>4+</sup> 2p <sub>3/2</sub> :918.8  |                                             |                                             |
|                                                                                                  | V <sup>5+</sup> 2p <sub>3/2</sub> :1132.0 |                                             |                                             |
| Sn <sub>0.696</sub> V <sub>0.304</sub> O <sub>2</sub>                                            | V 2p <sub>1/2</sub> :605.4                | Sn <sup>4+</sup> 3d <sub>3/2</sub> :26310.1 | O 1s: 6975                                  |
|                                                                                                  | V <sup>3+</sup> 2p <sub>3/2</sub> :122.8  | 3d <sub>5/2</sub> :18139.3                  |                                             |
|                                                                                                  | V <sup>4+</sup> 2p <sub>3/2</sub> :1005.5 |                                             |                                             |
|                                                                                                  | V <sup>5+</sup> 2p <sub>3/2</sub> :1248.3 |                                             |                                             |

#### Step 2: Normalization of areas calculated by photoelectron scattering cross section of respective orbitals.

The above estimated areas were normalized by photoelectron scattering cross section values of σ<sub>2p</sub> orbital of V: 0.1308, σ<sub>3d</sub> orbital of Sn: 0.3442 (for Al k<sub>α</sub> radiation). Finally, the vanadium content per formula unit obtained from Rietveld refinement was resolved in terms of co-existence of V<sup>3+</sup>, V<sup>4+</sup> and V<sup>5+</sup> states:

Table 2: Surface electronic composition based on XPS and refinement results

| Sample                                                  | SnO <sub>2</sub> | Sn <sub>0.696</sub> V <sub>0.304</sub> O <sub>2</sub>                                                                                | Sn <sub>0.657</sub> V <sub>0.343</sub> O <sub>2</sub>                                                                                |
|---------------------------------------------------------|------------------|--------------------------------------------------------------------------------------------------------------------------------------|--------------------------------------------------------------------------------------------------------------------------------------|
| V <sup>3+</sup> relative%                               | -                | 5.2% of 30.4%=1.580                                                                                                                  | 3% of 34.3%=1.029                                                                                                                    |
| V <sup>4+</sup> relative%                               | -                | 42.3% of 30.4%=12.859                                                                                                                | 43.5% of 34.3%=14.920                                                                                                                |
| V <sup>5+</sup> relative%                               | -                | 52.5% of 30.4%=15.96                                                                                                                 | 53.5% of 34.3%=18.350                                                                                                                |
| Quantitative oxidation states of metal atoms as per XPS | Sn <sup>4+</sup> | Sn <sup>4+</sup> <sub>0.696</sub> V <sup>3+</sup> <sub>0.016</sub> V <sup>4+</sup> <sub>0.128</sub> V <sup>5+</sup> <sub>0.160</sub> | Sn <sup>4+</sup> <sub>0.657</sub> V <sup>3+</sup> <sub>0.010</sub> V <sup>4+</sup> <sub>0.150</sub> V <sup>5+</sup> <sub>0.183</sub> |

**Step 3: Final surface charge estimation**

Finally, based on the surface composition per formula unit, the net charge content is calculated:

Table 3: Net excess surface charge calculation

| Sample                                                    | SnO <sub>2</sub> | Sn <sub>0.696</sub> V <sub>0.304</sub> O <sub>2</sub> | Sn <sub>0.657</sub> V <sub>0.343</sub> O <sub>2</sub> |
|-----------------------------------------------------------|------------------|-------------------------------------------------------|-------------------------------------------------------|
| Additional positive charge of metal atoms due to V doping | -                | [(4×0.696)+(3×0.016)+(4×0.128)+(5×0.160)]-(2×2)=0.144 | [(4×0.657)+(3×0.010)+(4×0.150)+(5×0.183)]-(2×2)=0.173 |

Since both the vanadium doped samples have comparable surface oxygen vacancy (as obtained from XPS), the overall surface charge was determined by the relative ionic states of V and Sn atoms. Sn<sub>0.696</sub>V<sub>0.304</sub>O<sub>2</sub> having ~1.2 times lesser additional surface positive charge than Sn<sub>0.657</sub>V<sub>0.343</sub>O<sub>2</sub> shows 1.2 times better ammonia sensing than latter. This can be attributed to lesser surface electron immobilization in Sn<sub>0.696</sub>V<sub>0.304</sub>O<sub>2</sub> than Sn<sub>0.657</sub>V<sub>0.343</sub>O<sub>2</sub>, therefore leading to greater electron flow to bulk (see ref. 48 of main paper).

**Case 2: Al doped SnO<sub>2</sub> nano systems with oxygen vacancies (Sl. No. 1 of Table 1 in main paper)**

Table 4: Quantitative values of area under curve obtained from XPS curve deconvolution

| Sample                                                                                                | Aluminium                                                       | Tin          | Oxygen (O <sub>2</sub> <sup>-defect</sup> ) |
|-------------------------------------------------------------------------------------------------------|-----------------------------------------------------------------|--------------|---------------------------------------------|
| Sn <sub>0.947</sub> Al <sub>0.144</sub> O <sub>1.881</sub><br>(Formula unit from Rietveld refinement) | Al 2p: 140.55 (Al <sup>3+</sup> )<br>22.432 (Al <sup>2+</sup> ) | Sn 3d: 36217 | O <sub>2</sub> <sup>defect</sup> : 6095     |
| Sn <sub>0.869</sub> Al <sub>0.242</sub> O <sub>1.888</sub>                                            | Al 2p: 581.47 (Al <sup>3+</sup> )<br>74.51 (Al <sup>2+</sup> )  | Sn 3d: 42255 | O <sub>2</sub> <sup>defect</sup> : 5594     |

Table 5: Surface electronic composition based on XPS and refinement results

| Sample                                                                                                | Surface electronic composition                                                                                                         |
|-------------------------------------------------------------------------------------------------------|----------------------------------------------------------------------------------------------------------------------------------------|
| Sn <sub>0.947</sub> Al <sub>0.144</sub> O <sub>1.881</sub><br>(Formula unit from Rietveld refinement) | Sn <sub>0.947</sub> <sup>4+</sup> Al <sub>0.020</sub> <sup>2+</sup> Al <sub>0.124</sub> <sup>3+</sup> O <sub>1.881</sub> <sup>2-</sup> |
| Sn <sub>0.869</sub> Al <sub>0.242</sub> O <sub>1.888</sub>                                            | Sn <sup>4+</sup> <sub>0.869</sub> Al <sup>2+</sup> <sub>0.027</sub> Al <sup>3+</sup> <sub>0.215</sub> O <sub>1.888</sub> <sup>2-</sup> |

Table 6: Net excess surface charge calculation

| Sample                                                     | Surface positive charge/formula unit |
|------------------------------------------------------------|--------------------------------------|
| Sn <sub>0.947</sub> Al <sub>0.144</sub> O <sub>1.881</sub> | [(4×0.947)+(2×0.020)+(3×0.124)]-     |

|                                                      |                                                                                       |
|------------------------------------------------------|---------------------------------------------------------------------------------------|
| (Formula unit from Rietveld refinement)              | $(2 \times 1.881) = 0.438$                                                            |
| $\text{Sn}_{0.869}\text{Al}_{0.242}\text{O}_{1.888}$ | $[(4 \times 0.869) + (2 \times 0.027) + (3 \times 0.215) - (2 \times 1.888)] = 0.399$ |

For Al doped  $\text{SnO}_2$  nano systems, contribution from surface oxygen vacancy in each sample was included in overall surface charge calculation which showed that  $\text{Sn}_{0.947}\text{Al}_{0.144}\text{O}_{1.881}$  and  $\text{Sn}_{0.869}\text{Al}_{0.242}\text{O}_{1.888}$  have excess surface positive charge/formula unit with values 0.438 and 0.399 respectively. Due to lesser surface electron mobilization in latter, the  $\text{Sn}_{0.869}\text{Al}_{0.242}\text{O}_{1.888}$  sample is more responsive to reducing ethanol gas than the former (see ref. 47 of main paper).
